# Supplementary material for: Clinical Experience with Genome-Wide Noninvasive Prenatal Screening in a Large Cohort of Twin Pregnancies
Source: MDPI journal article supplement (doi:10.3390/genes14050982), 2023-04-26
Supplement: s1 [file s1]

**Table S1: NIPT performance for detecting trisomies 21, 18, 13 in 8 triplet pregnancies**

|    | Maternal Age | Gestational Age (weeks) | Method of conception         | FF (%) | Chorionicity  | NIPT results                       |
|----|--------------|-------------------------|------------------------------|--------|---------------|------------------------------------|
| 1  | 41.94        | 13+3                    | spontaneous                  | 12     | Monochorionic | Negative                           |
| 2  | 38.67        | 13+5                    | art                          | 15     | Trichorionic  | T21 (confirmed with amniocentesis) |
| 3  | 32.55        | 13                      | art                          | 15     | Trichorionic  | Negative                           |
| 4  | 37.02        | 11                      | spontaneous                  | 15     | Trichorionic  | Negative                           |
| 5  | 35.15        | 10+4                    | spontaneous                  | 10     | Trichorionic  | Negative                           |
| 6  | 43.82        | 11+5                    | art                          | 18     | Trichorionic  | Negative                           |
| 7  | 39.13        | 13+4                    | art                          | 12     | Trichorionic  | Negative                           |
| 8  | 28.18        | 13+1                    | art                          | 10     | Trichorionic  | Negative                           |
| 9  | 30.78        | 13+2                    | spontaneous                  | 19     | Trichorionic  | Negative                           |
| 10 | 50.68        | 11+4                    | art (one embryo transferred) | 8      | Monochorionic | Negative                           |

art, assisted reproductive technology
